# Supplementary material
Source: publisher figshare collection journal article supplement (https://geolsoc.figshare.com/ndownloader/files/26743292)

Supplementary Figure S2: Enlarged and uninterpreted seismic lines

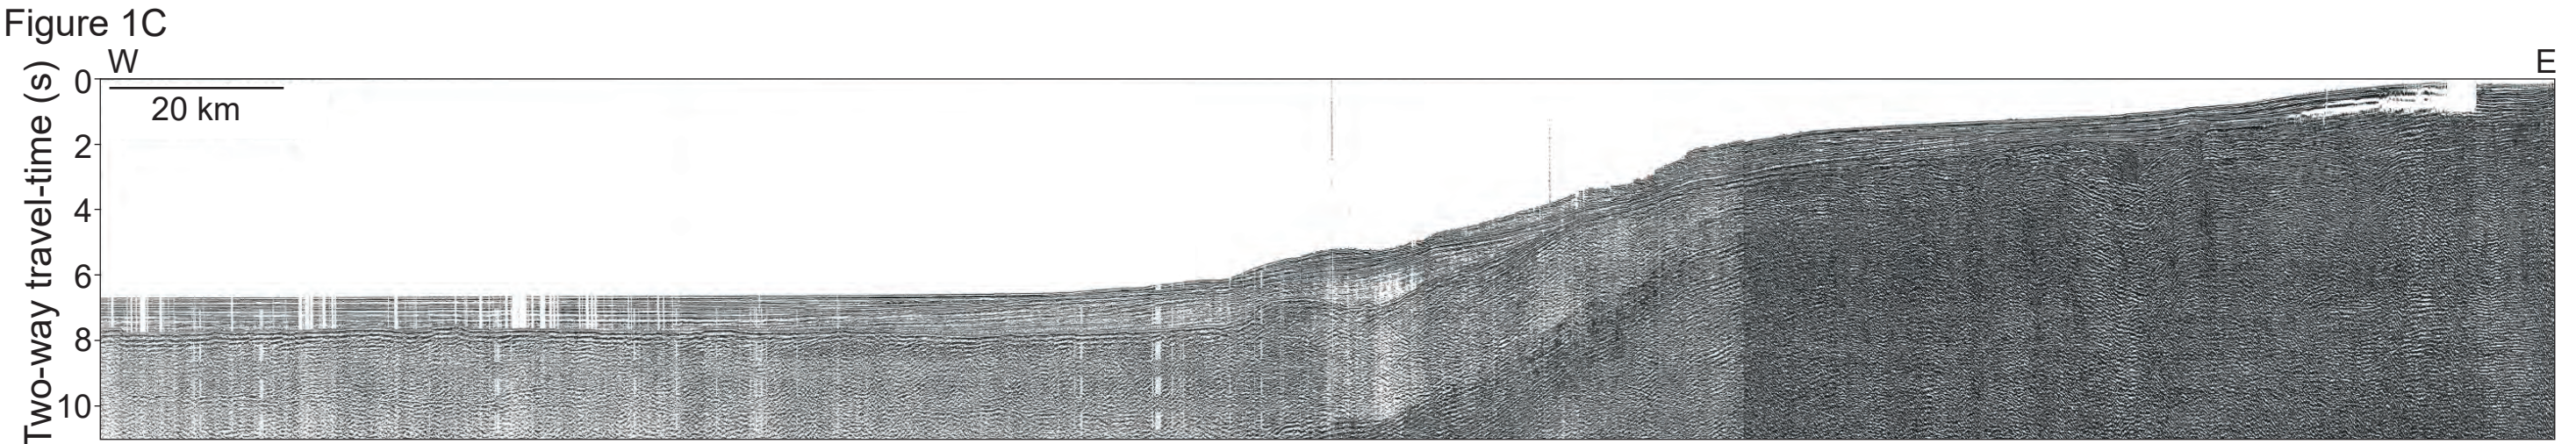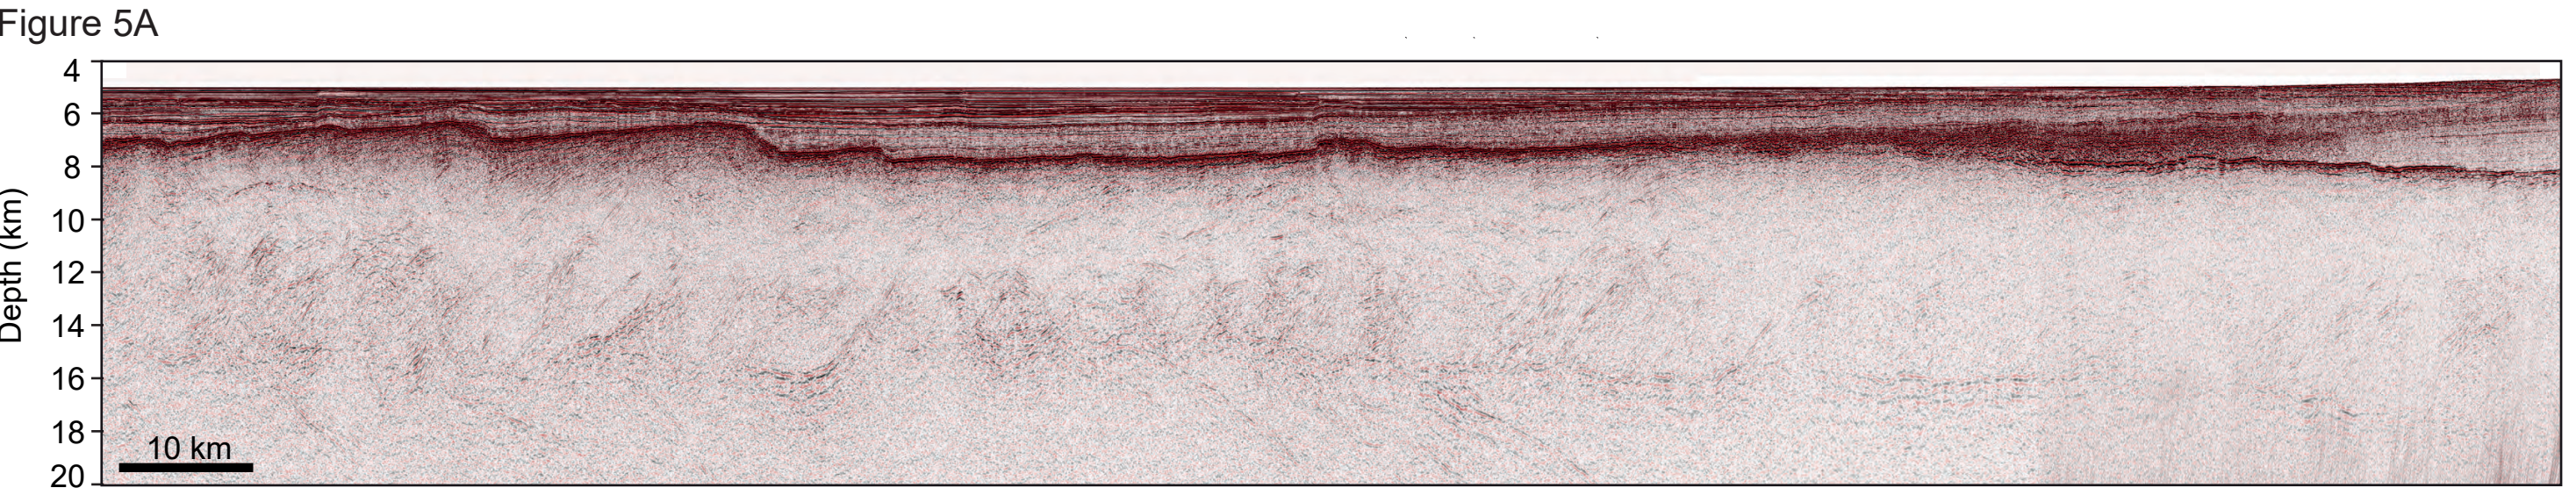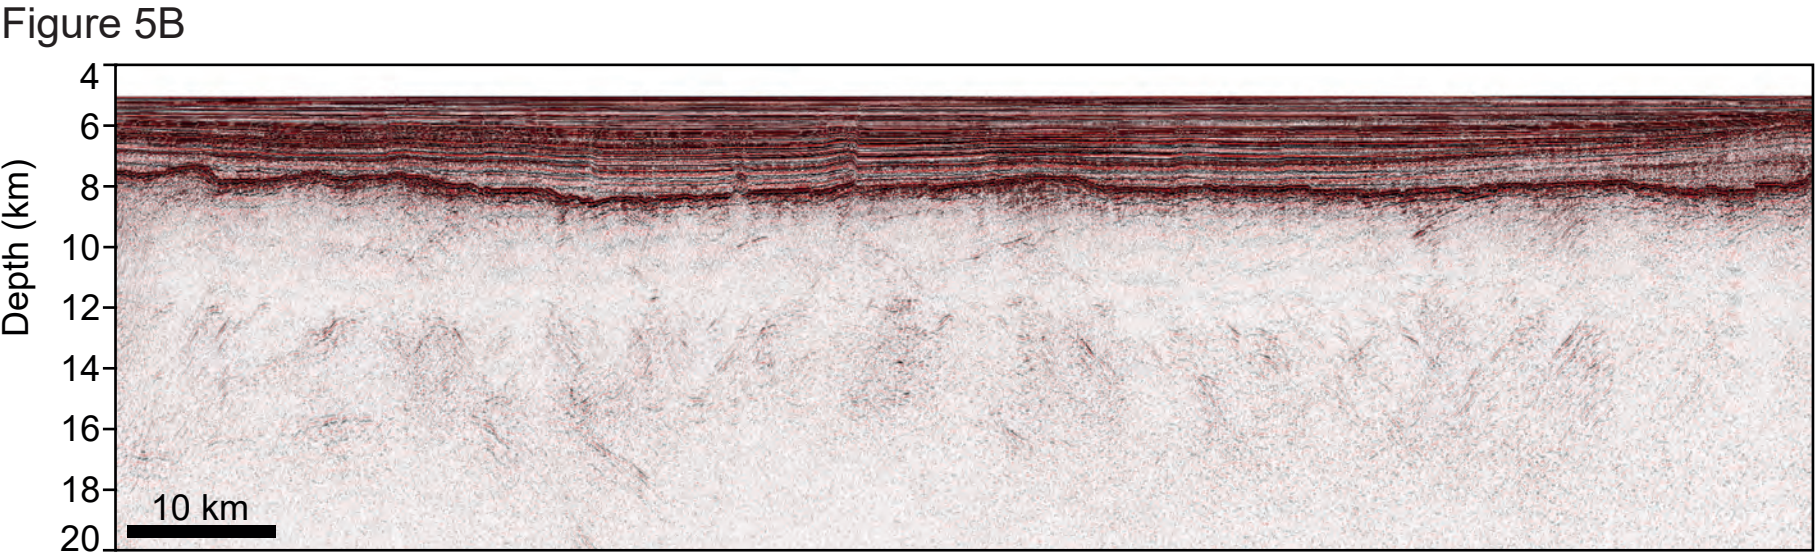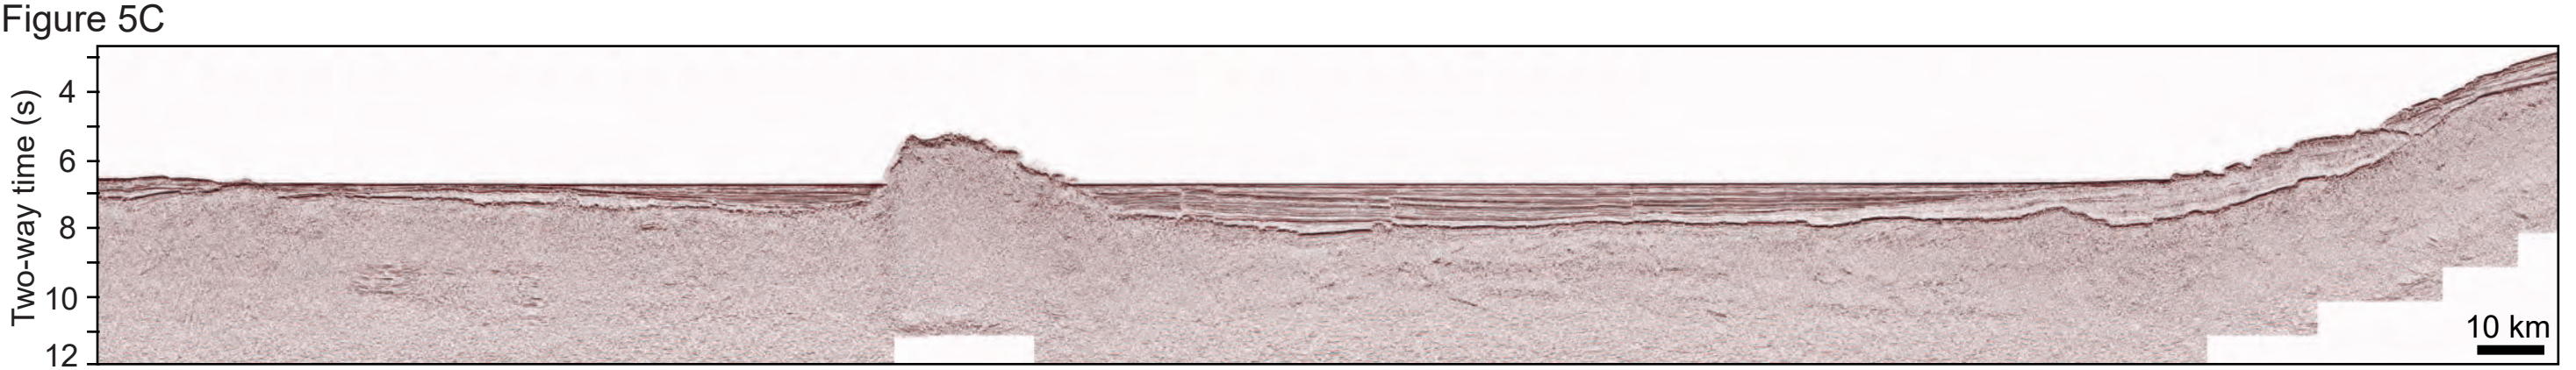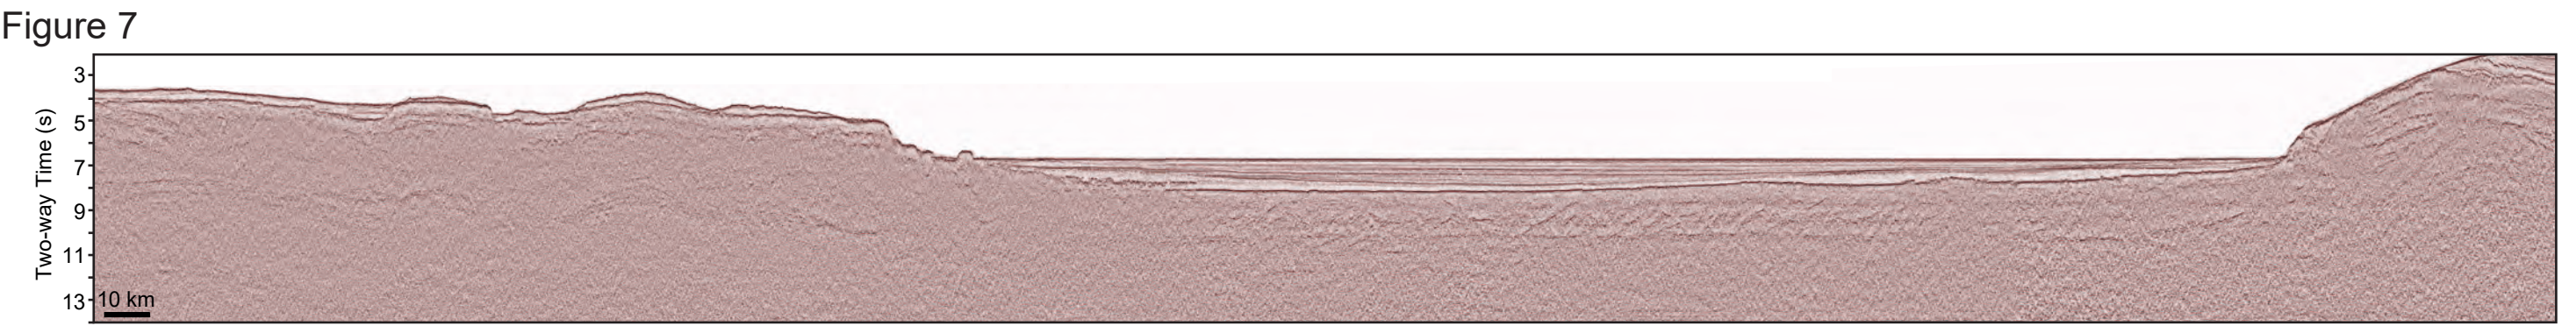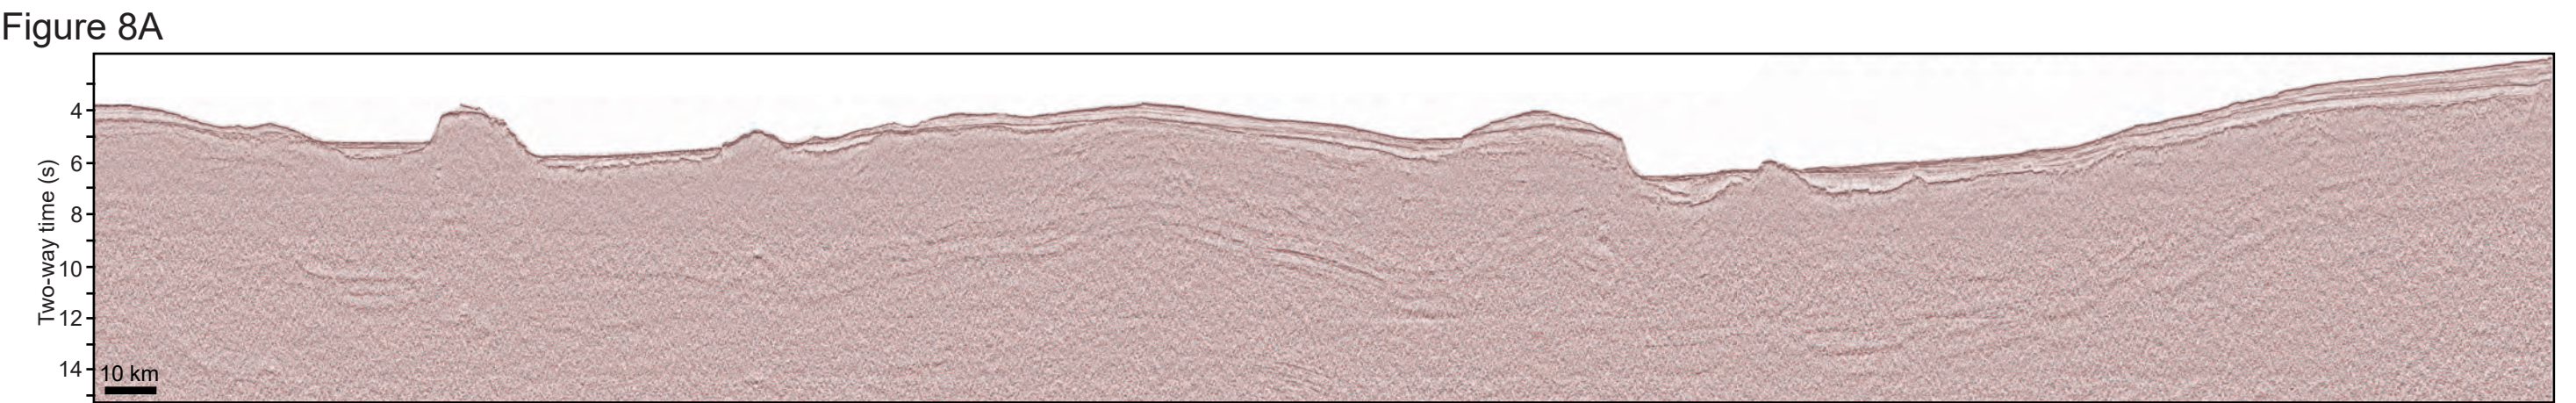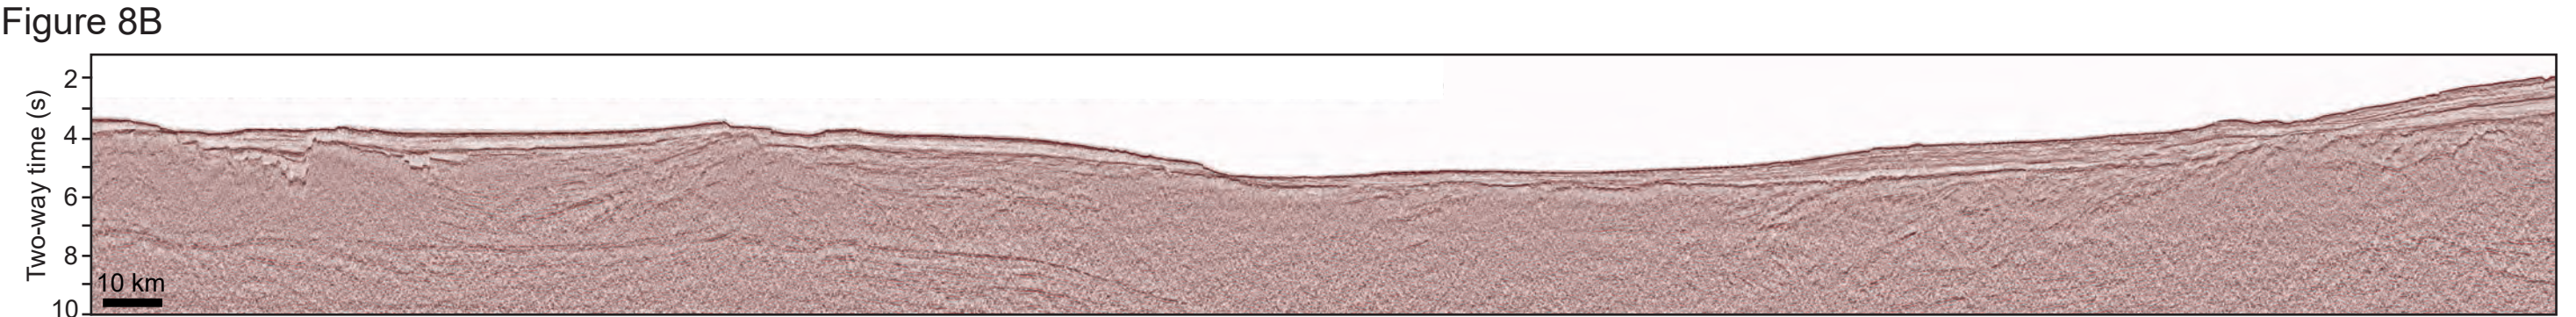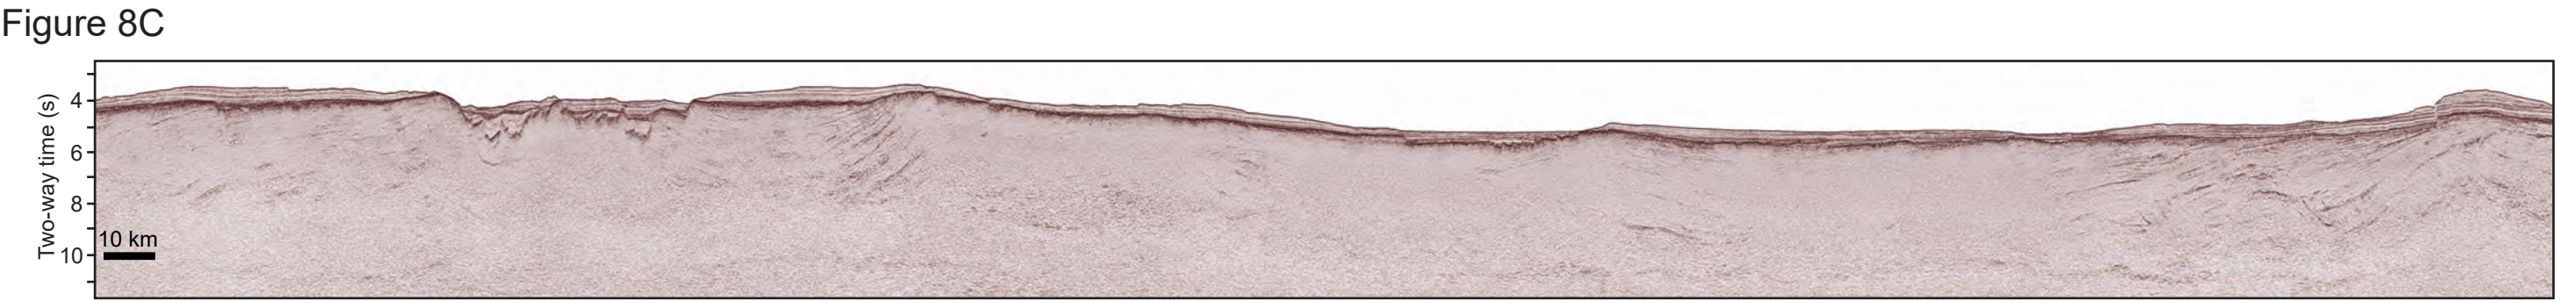

Supplement: Supplementary file 1 [file 26743292]
